# Supplementary material
Source: PubMed Central journal article supplement (PMC3494819)

**A. Visual grid**

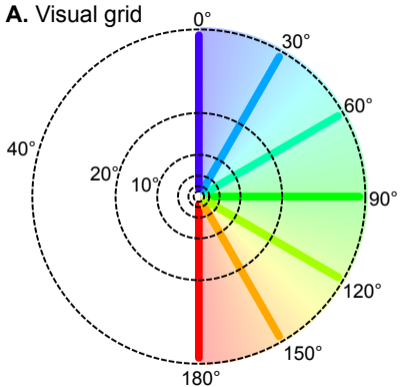

**B. Projected grid**

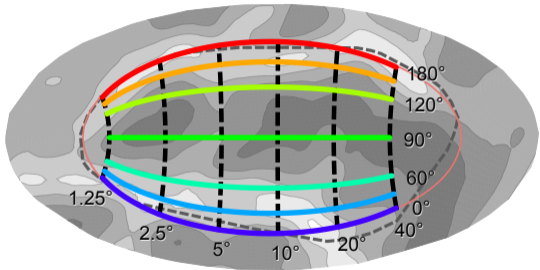

### A. Aggregate polar angle

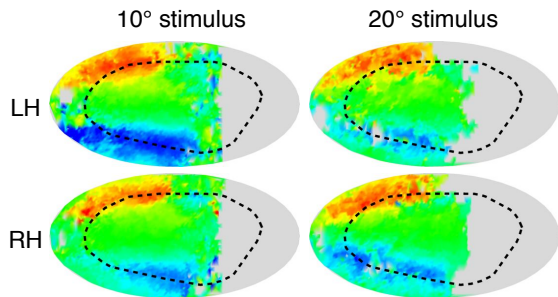

### B. Aggregate eccentricity

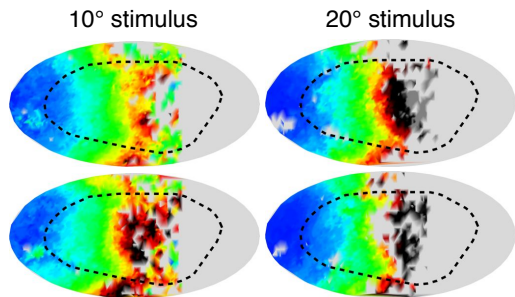

### C. Polar Angle Comparison

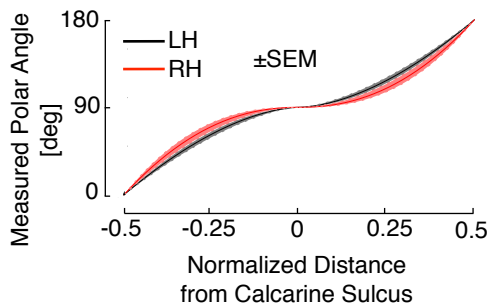

### D. Eccentricity Comparison

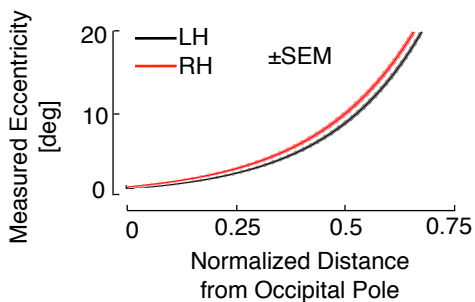

**A. Polar-angle split-halves reliability**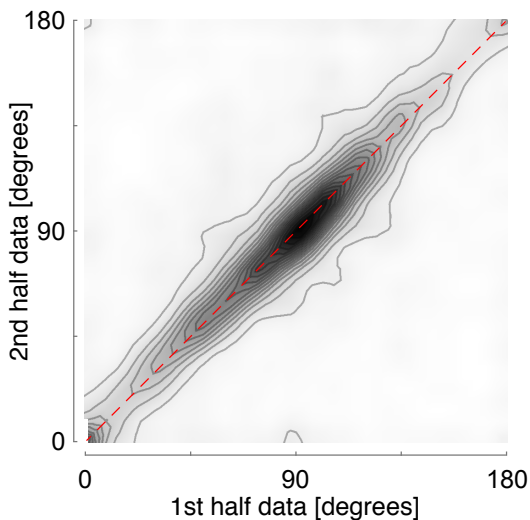**B. Split-halves prediction error**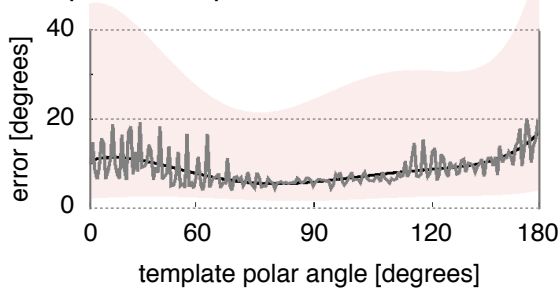**C. Map of prediction error**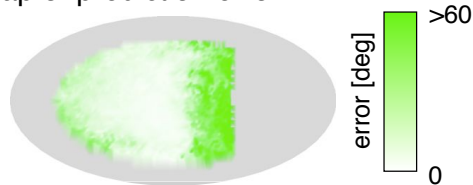**D. Polar Angle template prediction versus fMRI scanning duration**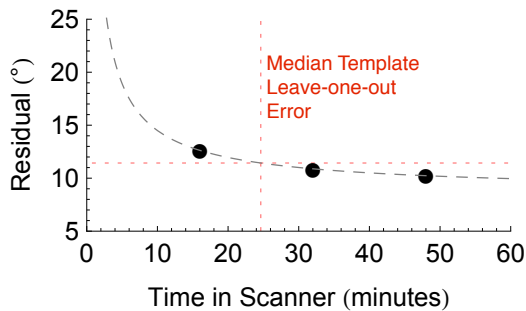**E. Eccentricity template prediction versus fMRI scanning duration**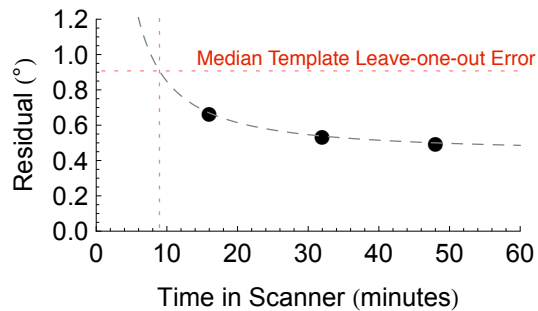

Supplement: NIHMS407641-supplement-01.pdf [file NIHMS407641-supplement-01.pdf]
